# Supplementary material
Source: PubMed Central journal article supplement (PMC2175545)
Supplement: mmc1.pdf [file mmc1.pdf]

Supplemental Table 1. Characteristics of Tumor Tissues

| #  | Specimen |            | % Necrosis |            |                       | Truth*              | Sample Site                                                                                                | Morphology |
|----|----------|------------|------------|------------|-----------------------|---------------------|------------------------------------------------------------------------------------------------------------|------------|
|    | ID       | % Necrosis | Tumor      | Type       | Truth*                |                     |                                                                                                            |            |
| 1  | 06_0283  | 0          | 50         | Metastatic | Bladder               | Lymph node          | Metastatic carcinoma with features of a high grade urothelial carcinoma                                    |            |
| 2  | 06_0292  | 0          | 90         | Metastatic | Bladder               | Lung                | Metastatic high-grade urothelial carcinoma involving the visceral pleura with angiolymphatic invasion      |            |
| 3  | 06_0300  | 0          | 70         | Metastatic | Bladder               | Lymph node          | Metastatic urothelial carcinoma with extranodal extension and blood vessel deposits                        |            |
| 4  | 06_0259  | 0          | 100        | Metastatic | Breast                | Ovary               | Metastatic adenocarcinoma consistent with breast primary                                                   |            |
| 5  | 06_0269  | 5          | 100        | Metastatic | Breast                | Liver               | Metastatic carcinoma consistent with metastasis from the breast                                            |            |
| 6  | 06_0277  | 30         | 100        | Metastatic | Breast                | Lung                | Metastatic moderately differentiated adenocarcinoma                                                        |            |
| 7  | 06_0321  | 5          | 95         | Primary    | Breast                | Breast              | Undifferentiated adenocarcinoma with focal mucin production                                                |            |
| 8  | 06_0339  | 20         | 100        | Metastatic | Breast                | Liver               | Moderately diff. adenocarcinoma consistent w/ metastatic ductal adenocarcinoma of breast                   |            |
| 9  | 06_0344  | 5          | 95         | Metastatic | Breast                | Lymph node          | Metastatic carcinoma                                                                                       |            |
| 10 | 06_0260  | 10         | 100        | Primary    | Colorectal            | Colon               | Moderate to poorly differentiated adenocarcinoma extending into the subserosal fat                         |            |
| 11 | 06_0262  | 5          | 100        | Primary    | Colorectal            | Colon               | Invasive moderately to poorly differentiated adenocarcinoma of colon mucinous differentiation              |            |
| 12 | 06_0266  | 30         | 50         | Metastatic | Colorectal            | Lymph node          | Metastatic adenocarcinoma involving 11/24 pericolic lymph nodes                                            |            |
| 13 | 06_0278  | 10         | 95         | Metastatic | Colorectal            | Stomach             | Moderately differentiated adenocarcinoma with infiltrating gastric mucosa, muscularis propria, serosa      |            |
| 14 | 06_0320  | 0          | 100        | Metastatic | Colorectal            | Omentum             | Invasive, moderately differentiated adenocarcinoma                                                         |            |
| 15 | 06_0360  | 5          | 90         | Metastatic | Colorectal            | Lung                | Metastatic colorectal adenocarcinoma                                                                       |            |
| 16 | 08_1000  | n/a        | 40         | Metastatic | Gastric               | Parietal peritoneum | Adenocarcinoma moderately differentiated                                                                   |            |
| 17 | 08_1020  | n/a        | 65         | Metastatic | Gastric               | Ovary               | Signet ring carcinoma                                                                                      |            |
| 18 | 08_1050  | n/a        | 35         | Metastatic | Gastric               | Liver               | Adenocarcinoma of gastric                                                                                  |            |
| 19 | 06_0289  | 5          | 40         | Metastatic | Germ cell             | Lymph node          | Metastatic embryonal carcinoma in 5/7 lymph nodes                                                          |            |
| 20 | 06_0296  | 20         | 100        | Metastatic | Germ cell             | Lymph node          | Metastatic mixed germ cell tumor consisting of embryonal carcinoma and immature teratoma                   |            |
| 21 | 06_0301  | 30         | 70         | Metastatic | Germ cell             | Lymph node          | Metastatic germ cell tumor consisting predominantly of embryonal carcinoma and possible yolk sac component |            |
| 22 | 06_0329  | 20         | 100        | Metastatic | Kidney                | Liver               | Poorly differentiated carcinoma with clear cell and oncocytic differentiation and massive necrosis         |            |
| 23 | 06_0333  | 0          | 90         | Metastatic | Kidney                | Adrenal gland       | Metastatic renal cell carcinoma                                                                            |            |
| 24 | 06_0377  | 30         | 100        | Primary    | Kidney                | Kidney              | Sarcomatoid renal cell carcinoma                                                                           |            |
| 25 | 06_0327  | 0          | 100        | Metastatic | Hepatocellular        | unknown             | Moderately differentiated metastatic hepatocellular carcinoma                                              |            |
| 26 | 06_0351  | 5          | 100        | Metastatic | Hepatocellular        | Lymph node          | Metastatic hepatocellular carcinoma with cellular anaplasia                                                |            |
| 27 | 06_0387  | 5          | 95         | Metastatic | Hepatocellular        | Colorectum          | Metastatic hepatocellular carcinoma w/ angiolymphatic invasion                                             |            |
| 28 | 06_0258  | 10         | 100        | Primary    | Non-small cell lung   | Lung                | Invasive poorly differentiated adenosquamous cell carcinoma                                                |            |
| 29 | 06_0261  | 10         | 90         | Metastatic | Non-small cell lung   | Lymph node          | Poorly differentiated non-small cell carcinoma                                                             |            |
| 30 | 06_0270  | 5          | 100        | Metastatic | Non-small cell lung   | Adrenal gland       | Metastatic moderately differentiated adenocarcinoma                                                        |            |
| 31 | 06_0273  | 0          | 95         | Metastatic | Non-small cell lung   | Adrenal gland       | Poorly differentiated lung adenocarcinoma                                                                  |            |
| 32 | 06_0274  | 5          | 100        | Metastatic | Non-small cell lung   | Adrenal gland       | Metastatic poorly differentiated carcinoma                                                                 |            |
| 33 | 06_0356  | 10         | 80         | Primary    | Non-small cell lung   | Lung                | Invasive pleomorphic carcinoma w/adenocarcinoma and spindle cell carcinoma                                 |            |
| 34 | 06_0268  | 0          | 100        | N/A        | Non-Hodgkins lymphoma | Lymph node          | Malignant lymphoma w/ plasmacytic differentiation and numerous large transformed cells                     |            |
| 35 | 06_0271  | 10         | 100        | N/A        | Non-Hodgkins lymphoma | Lymph node          | Malignant neoplasm, strongly favors malignant lymphoma w/ anaplastic features                              |            |
| 36 | 06_0272  | 5          | 100        | N/A        | Non-Hodgkins lymphoma | Thigh mass          | Malignant lymphoma, diffuse large B-cell type                                                              |            |
| 37 | 06_0276  | 0          | 100        | N/A        | Non-Hodgkins lymphoma | Thyroid             | Malignant lymphoma of B-cell type w/ low and intermediate grade components                                 |            |
| 38 | 06_0349  | 0          | 100        | N/A        | Non-Hodgkins lymphoma | Spleen              | Diffuse large B-cell Lymphoma                                                                              |            |
| 39 | 06_0459  | 1          | 100        | N/A        | Non-Hodgkins lymphoma | Extradural mass     | Anaplastic large cell lymphoma (CD30), Alk-1 negative                                                      |            |
| 40 | 06_0288  | 20         | 90         | Metastatic | Melanoma              | Stomach             | Metastatic melanoma involving full thickness of the gastric wall                                           |            |
| 41 | 06_0290  | 5          | 99         | Metastatic | Melanoma              | Small bowel         | Metastatic malignant melanoma                                                                              |            |
| 42 | 06_0460  | 0          | 80         | Metastatic | Melanoma              | Lung                | Metastatic melanoma                                                                                        |            |
| 43 | 06_0367  | 10         | 90         | Metastatic | Ovarian               | Mesentery/Sm Bowel  | Poorly diff. papillary serous carcinoma most likely of ovarian origin                                      |            |
| 44 | 06_0368  | 5          | 100        | Primary    | Ovarian               | Ovary               | Papillary serous adenocarcinoma involving both ovaries                                                     |            |
| 45 | 06_0369  | 20         | 100        | Primary    | Ovarian               | Ovary               | Papillary, high-grade, serous carcinoma of the ovary                                                       |            |
| 46 | 06_0264  | 20         | 100        | Primary    | Pancreas              | Pancreas            | Pancreatic ductal adenocarcinoma, invasive, poorly differentiated                                          |            |
| 47 | 06_0275  | 0          | 100        | Primary    | Pancreas              | Pancreas            | Pancreatic adenosquamous carcinoma, poorly differentiated                                                  |            |
| 48 | 06_0338  | 5          | 90         | Primary    | Pancreas              | Pancreas            | Moderately to poorly differentiated pancreatic adenocarcinoma arising in head of pancreas                  |            |
| 49 | 06_0342  | 0          | 100        | Metastatic | Pancreas              | Liver               | Moderately differentiated adenocarcinoma consistent w/ pancreatic primary                                  |            |
| 50 | 06_0343  | 5          | 100        | Primary    | Pancreas              | Pancreas            | Moderately to poorly diff. pancreatic adenocarcinoma of head of pancreas                                   |            |
| 51 | 06_0347  | 5          | 90         | Primary    | Pancreas              | Pancreas            | Moderately to poorly diff. mucinous adenocarcinoma w/signet ring cell features                             |            |
| 52 | 06_0323  | 0          | 100        | Metastatic | Prostate              | Lymph node          | Metastatic prostatic adenocarcinoma                                                                        |            |
| 53 | 06_0328  | 0          | 95         | Metastatic | Prostate              | Lymph node          | Metastatic adenocarcinoma consistent w/ prostatic origin                                                   |            |
| 54 | 06_0352  | 10         | 90         | Metastatic | Prostate              | Lymph node          | Metastatic, high grade prostatic adenocarcinoma                                                            |            |
| 55 | 06_0324  | 0          | 100        | Metastatic | Soft tissue sarcoma   | Liver               | High-grade sarcoma consistent w/ metastatic leiomyosarcoma from small intestine primary                    |            |
| 56 | 06_0325  | 0          | 100        | Metastatic | Soft tissue sarcoma   | Lung                | Metastatic osteosarcoma                                                                                    |            |
| 57 | 06_0359  | 0          | 98         | Metastatic | Soft tissue sarcoma   | Liver               | Multiple nodules of metastatic sarcoma                                                                     |            |
| 58 | 06_0317  | 0          | 90         | Metastatic | Thyroid               | Neck mass           | Metastatic follicular carcinoma, follicular variant                                                        |            |
| 59 | 06_0353  | 0          | 90         | Metastatic | Thyroid               | Muscle/Soft tissue  | Oncocytic carcinoma of the thyroid with clear cell change                                                  |            |
| 60 | 06_0358  | 0          | 60         | Primary    | Thyroid               | Thyroid             | Papillary carcinoma w/ a few foci of tall cell variant                                                     |            |

\*As noted per original surgical pathology report
