# Supplementary material
Source: PubMed Central journal article supplement (PMC2175545)
Supplement: mmc2.pdf [file mmc2.pdf]

**Supplemental Table 2.** Variations Between Laboratories in Tissue Handling and RNA Preparation for Microarray Analysis.

| Step | Process                                                                          | Site 1<br>UPitt                                                                                                                                                           | Site 2<br>VCU                                                                                | Site 3<br>Cogenics                                                               | Site 4<br>Stanford                            |
|------|----------------------------------------------------------------------------------|---------------------------------------------------------------------------------------------------------------------------------------------------------------------------|----------------------------------------------------------------------------------------------|----------------------------------------------------------------------------------|-----------------------------------------------|
| 1    | Tumor isolation                                                                  | <ul style="list-style-type: none"> <li>▪ RNAlater®-ICE</li> <li>▪ Microscope, scalpel</li> </ul>                                                                          | N/A                                                                                          | N/A                                                                              | N/A                                           |
| 2    | Tissue homogenization                                                            | Omni General Laboratory Homogenizer (GLH)                                                                                                                                 | Cryostat, (10 µm slices) into TRIzol                                                         | Omni GLH                                                                         | Fisher Scientific PowerGen 125                |
|      | Total RNA extraction                                                             | <ul style="list-style-type: none"> <li>▪ Ambion <i>mirVana</i>™ miRNA Isolation Kit</li> <li>▪ QIAGEN RNeasy Midi/Mini Kits</li> </ul>                                    | <ul style="list-style-type: none"> <li>▪ TRIzol</li> <li>▪ QIAGEN RNeasy Mini Kit</li> </ul> | QIAGEN RNeasy Mini Kit                                                           | QIAGEN RNeasy Midi/Mini Kits                  |
|      | Total RNA quantity used                                                          | 1 µg                                                                                                                                                                      | 5 µg                                                                                         | 1 µg                                                                             | 1 µg                                          |
|      | Total RNA quality for test (A <sub>260</sub> /A <sub>280</sub> ; 18S/28S Yes/No) | >1.8<br>Yes                                                                                                                                                               | >1.8<br>Yes                                                                                  | >1.8<br>Yes                                                                      | >1.8<br>Yes, Agarose Gel Electrophoresis only |
| 3    | cDNA synthesis                                                                   | GeneChip® One-Cycle cDNA Synthesis Kit (Manufactured by Invitrogen for Affymetrix)                                                                                        |                                                                                              |                                                                                  |                                               |
|      | cDNA cleanup                                                                     | Affymetrix Sample Cleanup Module (Manufactured by QIAGEN for Affymetrix)                                                                                                  |                                                                                              |                                                                                  |                                               |
|      | In vitro transcription                                                           | GeneChip® Expression 3'-Amplification Reagents for IVT Labeling (IVT Labeling Kit with MEGAscript® reagents; Manufactured by Ambion for Affymetrix)                       |                                                                                              |                                                                                  |                                               |
|      | cRNA cleanup                                                                     | Affymetrix Sample Cleanup Module                                                                                                                                          |                                                                                              |                                                                                  |                                               |
| 4    | Fragmentation                                                                    | 5X Fragmentation Buffer (Affymetrix)                                                                                                                                      |                                                                                              |                                                                                  |                                               |
| 5    | Hybridization                                                                    | GeneChip® Hybridization, Wash, and Stain kit                                                                                                                              | Laboratory-prepared reagents                                                                 | GeneChip® Hybridization, Wash, and Stain kit                                     | GeneChip® Hybridization, Wash, and Stain kit  |
|      | GeneChip® array                                                                  | <ul style="list-style-type: none"> <li>▪ Human Genome U133A (HG-U133A) (Affymetrix)</li> <li>▪ Pathchip™ (Manufactured by Affymetrix for Pathwork Diagnostics)</li> </ul> | <ul style="list-style-type: none"> <li>▪ HG-U133A</li> <li>▪ Pathchip</li> </ul>             | <ul style="list-style-type: none"> <li>▪ HG-U133A</li> <li>▪ Pathchip</li> </ul> | Pathchip                                      |
|      | Fluidics station                                                                 | Affymetrix GeneChip® Fluidics Station 450 (FS450)                                                                                                                         | Affymetrix FS450                                                                             | Affymetrix FS450                                                                 | Affymetrix FS450 Dx                           |

| <b>Step</b> | <b>Process</b>                                        | <b>Site 1<br/>UPitt</b>                                                              | <b>Site 2<br/>VCU</b>                                                                              | <b>Site 3<br/>Cogenics</b>                                                           | <b>Site 4<br/>Stanford</b>                                                                      |
|-------------|-------------------------------------------------------|--------------------------------------------------------------------------------------|----------------------------------------------------------------------------------------------------|--------------------------------------------------------------------------------------|-------------------------------------------------------------------------------------------------|
| 5<br>cont.  | Fluidics script                                       | <ul style="list-style-type: none"> <li>▪ FS450_0001</li> <li>▪ FS450_0004</li> </ul> | <ul style="list-style-type: none"> <li>▪ FS450_EukGE-WS2v4</li> <li>▪ FS450_EukGE-WS2v5</li> </ul> | <ul style="list-style-type: none"> <li>▪ FS450_0001</li> <li>▪ FS450_0004</li> </ul> | FS450_0001                                                                                      |
|             | Hybridization oven/<br>temperature/<br>rotation speed | Affymetrix<br>Hybridization Oven<br>640 (HO640)<br>45 °C<br>60 RPM                   | Affymetrix HO640<br><br>45 °C<br>60 RPM                                                            | Affymetrix HO640<br><br>45 °C<br>60 RPM                                              | Sheldon Mfg. Inc.<br><br>SHEL LAB<br>Hybridization Oven<br>model #1012AG<br><br>45 °C<br>20 RPM |
|             | Wash and staining                                     | GeneChip®<br>Hybridization, Wash,<br>and Stain kit                                   | Laboratory-prepared<br>reagents                                                                    | GeneChip®<br>Hybridization, Wash,<br>and Stain kit                                   | GeneChip®<br>Hybridization, Wash,<br>and Stain kit                                              |
|             | Microarray Scanner                                    | GeneChip® Scanner<br>(GCS) 3000 6G*<br>with Autoloader                               | GCS 3000 6G*<br>with Autoloader                                                                    | GCS 3000 6G*<br>with and without<br>Autoloader                                       | GCS 3000 Dx                                                                                     |
| 6           | GeneChip®<br>Operating Software                       | Version 1.4                                                                          | Version 1.4                                                                                        | Version 1.4                                                                          | Version 1.1.3                                                                                   |
|             | Pathchip™ Tissue of<br>Origin Software                | Version 21.2                                                                         |                                                                                                    |                                                                                      |                                                                                                 |

RPM, revolutions per minute.
