# Supplementary material
Source: PubMed Central journal article supplement (PMC2175545)
Supplement: mmc3.pdf [file mmc3.pdf]

---

**Supplemental Table 3: Training Set for the  
Development of the Pathwork TOO Test**

| <b>Tumor Type</b>      | <b>Number of Specimens</b> |
|------------------------|----------------------------|
| Bladder                | 62                         |
| Breast                 | 444                        |
| Colorectal             | 253                        |
| Gastric                | 52                         |
| Germ cell              | 121                        |
| Kidney                 | 151                        |
| Hepatocellular         | 41                         |
| Non-small cell lung    | 221                        |
| Non-Hodgkin's lymphoma | 97                         |
| Melanoma               | 69                         |
| Ovarian                | 189                        |
| Pancreas               | 43                         |
| Prostate               | 105                        |
| Soft tissue sarcoma    | 122                        |
| Thyroid                | 69                         |
| <b>TOTAL</b>           | <b>2039</b>                |

---
