# Supplementary material
Source: PubMed Central journal article supplement (PMC2175545)
Supplement: mmc4.pdf [file mmc4.pdf]

**Supplemental Table 4. Pathwork TOO Results for All Samples**

| #  | Specimen ID | % Necrosis | % Tumor | Clinical Truth* | Sample Site | Site | Data Verification | Top TOO Score | Top TOO ID | Pathwork TOO Result | Agreement with Clinical Truth | Morphologies                                                                                          |
|----|-------------|------------|---------|-----------------|-------------|------|-------------------|---------------|------------|---------------------|-------------------------------|-------------------------------------------------------------------------------------------------------|
| 1  | 06_0283     | 0          | 50      | Bladder         | Lymph node  | 1    | Pass              | 35.7          | Breast     | Breast              | NonAgree                      | Metastatic carcinoma with features of a high-M31grade urothelial carcinoma                            |
| 2  |             |            |         |                 |             | Pass | 46.4              | Breast        | Breast     | NonAgree            |                               |                                                                                                       |
| 3  |             |            |         |                 |             | Pass | 29.0              | Breast        | IND        | IND                 |                               |                                                                                                       |
| 4  |             |            |         |                 |             | Pass | 29.7              | Breast        | IND        | IND                 |                               |                                                                                                       |
| 5  | 06_0292     | 0          | 90      | Bladder         | Lung        | 1    | Pass              | 56.9          | Bladder    | Bladder             | Agree                         | Metastatic high-grade urothelial carcinoma involving the visceral pleura with angiolymphatic invasion |
| 6  |             |            |         |                 |             | Pass | 71.2              | Bladder       | Bladder    | Agree               |                               |                                                                                                       |
| 7  |             |            |         |                 |             | Pass | 43.2              | Bladder       | Bladder    | Agree               |                               |                                                                                                       |
| 8  |             |            |         |                 |             | Pass | 45.0              | Bladder       | Bladder    | Agree               |                               |                                                                                                       |
| 9  | 06_0300     | 0          | 70      | Bladder         | Lymph node  | 1    | Pass              | 33.6          | Bladder    | Bladder             | Agree                         | Metastatic urothelial carcinoma with extranodal extension and blood vessel deposits                   |
| 10 |             |            |         |                 |             | Pass | 27.6              | Lung          | IND        | IND                 |                               |                                                                                                       |
| 11 |             |            |         |                 |             | Pass | 26.8              | Lung          | IND        | IND                 |                               |                                                                                                       |
| 12 |             |            |         |                 |             | Pass | 16.2              | Lung          | IND        | IND                 |                               |                                                                                                       |
| 13 | 06_0259     | 0          | 100     | Breast          | Ovary       | 1    | Pass              | 71.8          | Breast     | Breast              | Agree                         | Metastatic adenocarcinoma consistent with breast primary                                              |
| 14 |             |            |         |                 |             | Pass | 89.5              | Breast        | Breast     | Agree               |                               |                                                                                                       |
| 15 |             |            |         |                 |             | Pass | 71.1              | Breast        | Breast     | Agree               |                               |                                                                                                       |
| 16 |             |            |         |                 |             | Pass | 50.7              | Ovary         | Breast     | Agree               |                               |                                                                                                       |
| 17 | 06_0269     | 5          | 95      | Breast          | Liver       | 1    | Pass              | 90.3          | Breast     | Breast              | Agree                         | Metastatic carcinoma consistent with metastasis from the breast                                       |
| 18 |             |            |         |                 |             | Pass | 95.6              | Breast        | Breast     | Agree               |                               |                                                                                                       |
| 19 |             |            |         |                 |             | Pass | 90.2              | Breast        | Breast     | Agree               |                               |                                                                                                       |
| 20 |             |            |         |                 |             | Pass | 88.0              | Breast        | Breast     | Agree               |                               |                                                                                                       |
| 21 | 06_0277     | 30         | 70      | Breast          | Lung        | 1    | Pass              | 56.2          | Lung       | Lung                | NonAgree                      | Metastatic moderately differentiated adenocarcinoma                                                   |
| 22 |             |            |         |                 |             | Pass | 70.2              | Breast        | Breast     | Agree               |                               |                                                                                                       |
| 23 |             |            |         |                 |             | Pass | 47.6              | Lung          | Breast     | Agree               |                               |                                                                                                       |
| 24 |             |            |         |                 |             | Pass | 54.7              | Breast        | Breast     | Agree               |                               |                                                                                                       |
| 25 | 06_0321     | 5          | 90      | Breast          | Breast      | 1    | Fail              |               |            |                     |                               | Undifferentiated adenocarcinoma with focal mucin production                                           |
| 26 |             |            |         |                 |             | Pass | 25.3              | Lung          | IND        | IND                 |                               |                                                                                                       |
| 27 |             |            |         |                 |             | Pass | 22.5              | Lung          | IND        | IND                 |                               |                                                                                                       |
| 28 |             |            |         |                 |             | Fail |                   |               |            |                     |                               |                                                                                                       |
| 29 | 06_0339     | 20         | 80      | Breast          | Liver       | 1    | Pass              | 93.6          | Breast     | Breast              | Agree                         | Moderately diff. adenocarcinoma consistent with metastatic ductal adenocarcinoma of breast            |
| 30 |             |            |         |                 |             | Pass | 92.6              | Breast        | Breast     | Agree               |                               |                                                                                                       |
| 31 |             |            |         |                 |             | Pass | 94.0              | Breast        | Breast     | Agree               |                               |                                                                                                       |
| 32 |             |            |         |                 |             | Pass | 77.8              | Breast        | Breast     | Agree               |                               |                                                                                                       |
| 33 | 06_0344     | 5          | 90      | Breast          | Lymph node  | 1    | Pass              | 88.3          | Breast     | Breast              | Agree                         | Metastatic carcinoma                                                                                  |
| 34 |             |            |         |                 |             | Pass | 92.3              | Breast        | Breast     | Agree               |                               |                                                                                                       |
| 35 |             |            |         |                 |             | Pass | 95.4              | Breast        | Breast     | Agree               |                               |                                                                                                       |
| 36 |             |            |         |                 |             | Pass | 93.2              | Breast        | Breast     | Agree               |                               |                                                                                                       |
| 37 | 06_0260     | 10         | 90      | Colorectal      | Colon       | 1    | Pass              | 59.7          | Colon      | Colon               | Agree                         | Moderate to poorly differentiated adenocarcinoma extending into the subserosal fat                    |
| 38 |             |            |         |                 |             | Pass | 86.7              | Colon         | Colon      | Agree               |                               |                                                                                                       |
| 39 |             |            |         |                 |             | Pass | 67.5              | Colon         | Colon      | Agree               |                               |                                                                                                       |
| 40 |             |            |         |                 |             | Pass | 84.3              | Colon         | Colon      | Agree               |                               |                                                                                                       |
| 41 | 06_0262     | 5          | 95      | Colorectal      | Colon       | 1    | Pass              | 78.3          | Colon      | Colon               | Agree                         | Invasive moderately to poorly differentiated adenocarcinoma of colon mucinous differentiation         |
| 42 |             |            |         |                 |             | Pass | 95.1              | Colon         | Colon      | Agree               |                               |                                                                                                       |
| 43 |             |            |         |                 |             | Pass | 81.1              | Colon         | Colon      | Agree               |                               |                                                                                                       |
| 44 |             |            |         |                 |             | Pass | 91.1              | Colon         | Colon      | Agree               |                               |                                                                                                       |
| 45 | 06_0266     | 30         | 20      | Colorectal      | Lymph node  | 1    | Pass              | 90.4          | Colon      | Colon               | Agree                         | Metastatic adenocarcinoma involving 11/24 pericolic lymph nodes                                       |
| 46 |             |            |         |                 |             | Pass | 86.8              | Colon         | Colon      | Agree               |                               |                                                                                                       |
| 47 |             |            |         |                 |             | Pass | 83.3              | Colon         | Colon      | Agree               |                               |                                                                                                       |
| 48 |             |            |         |                 |             | Pass | 96.6              | Colon         | Colon      | Agree               |                               |                                                                                                       |
| 49 | 06_0278     | 10         | 85      | Colorectal      | Stomach     | 1    | Pass              | 92.3          | Colon      | Colon               | Agree                         | Moderately differentiated adenocarcinoma with infiltrating gastric mucosa, muscularis propria, serosa |
| 50 |             |            |         |                 |             | Pass | 94.3              | Colon         | Colon      | Agree               |                               |                                                                                                       |
| 51 |             |            |         |                 |             | Pass | 93.6              | Colon         | Colon      | Agree               |                               |                                                                                                       |
| 52 |             |            |         |                 |             | Pass | 86.5              | Colon         | Colon      | Agree               |                               |                                                                                                       |
| 53 |             |            |         |                 |             | 1    | Pass              | 73.3          | Colon      | Colon               | Agree                         |                                                                                                       |

|     |         |     |     |            |                          |   |      |      |                     |           |          |                                                                                                            |  |
|-----|---------|-----|-----|------------|--------------------------|---|------|------|---------------------|-----------|----------|------------------------------------------------------------------------------------------------------------|--|
| 54  | 06_0320 | 0   | 100 | Colorectal | Omentum                  | 2 | Pass | 53.9 | Colon               | Colon     | Agree    | Invasive, moderately differentiated adenocarcinoma                                                         |  |
| 55  |         |     |     |            |                          | 3 | Pass | 65.5 | Colon               | Colon     | Agree    |                                                                                                            |  |
| 56  |         |     |     |            |                          | 4 | Pass | 82.8 | Colon               | Colon     | Agree    |                                                                                                            |  |
| 57  | 06_0360 | 5   | 85  | Colorectal | Lung                     | 1 | Pass | 83.2 | Colon               | Colon     | Agree    | Metastatic M127+M27 colorectal +M91 adenocarcinoma                                                         |  |
| 58  |         |     |     |            |                          | 2 | Pass | 60.2 | Colon               | Colon     | Agree    |                                                                                                            |  |
| 59  |         |     |     |            |                          | 3 | Pass | 89.4 | Colon               | Colon     | Agree    |                                                                                                            |  |
| 60  |         |     |     |            |                          | 4 | Pass | 75.6 | Colon               | Colon     | Agree    |                                                                                                            |  |
| 61  | 08_1000 | N/A | 40  | Gastric    | N/A                      | 1 | Pass | 44.0 | Gastric             | Gastric   | Agree    | Adenocarcinoma moderately differentiated                                                                   |  |
| 62  |         |     |     |            |                          | 2 |      |      | Insufficient RNA    |           |          |                                                                                                            |  |
| 63  |         |     |     |            |                          | 3 | Pass | 47.3 | Gastric             | Gastric   | Agree    |                                                                                                            |  |
| 64  |         |     |     |            |                          | 4 |      |      | Insufficient Sample |           |          |                                                                                                            |  |
| 65  | 08_1020 | N/A | 65  | Gastric    | N/A                      | 1 | Pass | 55.3 | Gastric             | Gastric   | Agree    | Signet ring carcinoma                                                                                      |  |
| 66  |         |     |     |            |                          | 2 |      |      | Insufficient RNA    |           |          |                                                                                                            |  |
| 67  |         |     |     |            |                          | 3 | Pass | 50.5 | Gastric             | Gastric   | Agree    |                                                                                                            |  |
| 68  |         |     |     |            |                          | 4 |      |      | Insufficient Sample |           |          |                                                                                                            |  |
| 69  | 08_1050 | N/A | 35  | Gastric    | N/A                      | 1 | Pass | 41.4 | Gastric             | Gastric   | Agree    | Adenocarcinoma of gastric                                                                                  |  |
| 70  |         |     |     |            |                          | 2 |      |      | Insufficient RNA    |           |          |                                                                                                            |  |
| 71  |         |     |     |            |                          | 3 | Pass | 45.4 | Gastric             | Gastric   | Agree    |                                                                                                            |  |
| 72  |         |     |     |            |                          | 4 |      |      | Insufficient Sample |           |          |                                                                                                            |  |
| 73  | 06_0289 | 5   | 35  | Germ Cell  | Lymph node               | 1 | Pass | 26.1 | Germ Cell           | IND       | IND      | Metastatic embryonal carcinoma in 5/7 lymph nodes                                                          |  |
| 74  |         |     |     |            |                          | 2 | Pass | 38.1 | Germ Cell           | Germ Cell | Agree    |                                                                                                            |  |
| 75  |         |     |     |            |                          | 3 | Pass | 59.7 | Germ Cell           | Germ Cell | Agree    |                                                                                                            |  |
| 76  |         |     |     |            |                          | 4 | Pass | 33.2 | Lymphoma            | Lymphoma  | NonAgree |                                                                                                            |  |
| 77  | 06_0296 | 20  | 80  | Germ Cell  | Lymph node               | 1 | Pass | 53.2 | Germ Cell           | Germ Cell | Agree    | Metastatic mixed germ cell tumor consisting of embryonal carcinoma and immature teratoma                   |  |
| 78  |         |     |     |            |                          | 2 | Pass | 58.5 | Germ Cell           | Germ Cell | Agree    |                                                                                                            |  |
| 79  |         |     |     |            |                          | 3 | Pass | 83.8 | Germ Cell           | Germ Cell | Agree    |                                                                                                            |  |
| 80  |         |     |     |            |                          | 4 | Pass | 44.7 | Germ Cell           | Germ Cell | Agree    |                                                                                                            |  |
| 81  | 06_0301 | 30  | 40  | Germ Cell  | Lymph node               | 1 | Pass | 36.8 | Lymphoma            | Lymphoma  | NonAgree | Metastatic germ cell tumor consisting predominantly of embryonal carcinoma and possible yolk sac component |  |
| 82  |         |     |     |            |                          | 2 | Pass | 67.4 | Germ Cell           | Germ Cell | Agree    |                                                                                                            |  |
| 83  |         |     |     |            |                          | 3 | Pass | 78.5 | Germ Cell           | Germ Cell | Agree    |                                                                                                            |  |
| 84  |         |     |     |            |                          | 4 | Pass | 55.7 | Lymphoma            | Lymphoma  | NonAgree |                                                                                                            |  |
| 85  | 06_0329 | 20  | 80  | Kidney     | Liver                    | 1 | Pass | 26.1 | Ovary               | IND       | IND      | Poorly differentiated carcinoma with clear cell and oncocytic differentiation and massive necrosis         |  |
| 86  |         |     |     |            |                          | 2 | Pass | 23.9 | Sarcoma             | IND       | IND      |                                                                                                            |  |
| 87  |         |     |     |            |                          | 3 | Pass | 35.5 | Sarcoma             | Sarcoma   | NonAgree |                                                                                                            |  |
| 88  |         |     |     |            |                          | 4 | Pass | 27.1 | Ovary               | Indet     | IND      |                                                                                                            |  |
| 89  | 06_0333 | 0   | 90  | Kidney     | Adrenal gland            | 1 | Pass | 91.5 | Kidney              | Kidney    | Agree    | Metastatic renal cell carcinoma                                                                            |  |
| 90  |         |     |     |            |                          | 2 | Pass | 87.1 | Kidney              | Kidney    | Agree    |                                                                                                            |  |
| 91  |         |     |     |            |                          | 3 | Pass | 91.4 | Kidney              | Kidney    | Agree    |                                                                                                            |  |
| 92  |         |     |     |            |                          | 4 | Pass | 87.3 | Kidney              | Kidney    | Agree    |                                                                                                            |  |
| 93  | 06_0377 | 30  | 70  | Kidney     | Kidney                   | 1 | Pass | 27.2 | Melanoma            | IND       | IND      | Sarcomatoid renal cell carcinoma                                                                           |  |
| 94  |         |     |     |            |                          | 2 | Pass | 24.3 | Kidney              | IND       | IND      |                                                                                                            |  |
| 95  |         |     |     |            |                          | 3 | Pass | 26.7 | Sarcoma             | IND       | IND      |                                                                                                            |  |
| 96  |         |     |     |            |                          | 4 | Pass | 17.3 | Melanoma            | IND       | IND      |                                                                                                            |  |
| 97  | 06_0327 | 0   | 100 | Liver      | Subcutaneous t+F211issue | 1 | Pass | 90.2 | Liver               | Liver     | Agree    | Moderately differentiated metastatic hepatocellular carcinoma                                              |  |
| 98  |         |     |     |            |                          | 2 | Pass | 91.6 | Liver               | Liver     | Agree    |                                                                                                            |  |
| 99  |         |     |     |            |                          | 3 | Pass | 90.3 | Liver               | Liver     | Agree    |                                                                                                            |  |
| 100 |         |     |     |            |                          | 4 | Pass | 91.2 | Liver               | Liver     | Agree    |                                                                                                            |  |
| 101 | 06_0351 | 5   | 95  | Liver      | Lymph node               | 1 | Pass | 93.2 | Liver               | Liver     | Agree    | Metastatic hepatocellular carcinoma with cellular anaplasia                                                |  |
| 102 |         |     |     |            |                          | 2 | Pass | 85.5 | Liver               | Liver     | Agree    |                                                                                                            |  |
| 103 |         |     |     |            |                          | 3 | Pass | 89.0 | Liver               | Liver     | Agree    |                                                                                                            |  |
| 104 |         |     |     |            |                          | 4 | Pass | 85.2 | Liver               | Liver     | Agree    |                                                                                                            |  |
| 105 | 06_0387 | 5   | 90  | Liver      | Colon / Rectum           | 1 | Pass | 96.4 | Liver               | Liver     | Agree    | Metastatic hepatocellular carcinoma w/ angiolymphatic invasion                                             |  |
| 106 |         |     |     |            |                          | 2 | Pass | 93.6 | Liver               | Liver     | Agree    |                                                                                                            |  |
| 107 |         |     |     |            |                          | 3 | Pass | 96.1 | Liver               | Liver     | Agree    |                                                                                                            |  |
| 108 |         |     |     |            |                          | 4 | Pass | 92.4 | Liver               | Liver     | Agree    |                                                                                                            |  |
| 109 | 06_0258 | 10  | 90  | Lung       | Lung                     | 1 | Pass | 54.7 | Lung                | Lung      | Agree    | Invasive poorly differentiated adenosquamous cell                                                          |  |
| 110 |         |     |     |            |                          | 2 | Pass | 86.3 | Lung                | Lung      | Agree    |                                                                                                            |  |

|     |         |    |     |          |                               |   |      |      |          |          |       |                                                                                          |
|-----|---------|----|-----|----------|-------------------------------|---|------|------|----------|----------|-------|------------------------------------------------------------------------------------------|
| 111 | 06_0250 | 10 | 90  | Lung     | Lung                          | 3 | Pass | 83.4 | Lung     | Lung     | Agree | carcinoma                                                                                |
| 112 |         |    |     |          |                               | 4 | Pass | 70.8 | Lung     | Lung     | Agree |                                                                                          |
| 113 | 06_0261 | 10 | 80  | Lung     | Lymph node                    | 1 | Pass | 34.9 | Lung     | Lung     | Agree | Poorly differentiated non-small-cell carcinoma                                           |
| 114 |         |    |     |          |                               | 2 | Pass | 38.2 | Lung     | Lung     | Agree |                                                                                          |
| 115 |         |    |     |          |                               | 3 | Pass | 46.6 | Lung     | Lung     | Agree |                                                                                          |
| 116 |         |    |     |          |                               | 4 | Pass | 29.4 | Lung     | Indet    | IND   |                                                                                          |
| 117 | 06_0270 | 5  | 95  | Lung     | Adrenal gland                 | 1 | Pass | 79.9 | Lung     | Lung     | Agree | Metastatic moderately differentiated adenocarcinoma                                      |
| 118 |         |    |     |          |                               | 2 | Pass | 78.5 | Lung     | Lung     | Agree |                                                                                          |
| 119 |         |    |     |          |                               | 3 | Pass | 84.1 | Lung     | Lung     | Agree |                                                                                          |
| 120 |         |    |     |          |                               | 4 | Pass | 84.3 | Lung     | Lung     | Agree |                                                                                          |
| 121 | 06_0273 | 0  | 95  | Lung     | Adrenal gland                 | 1 | Pass | 88.0 | Lung     | Lung     | Agree | Poorly differentiated lung adenocarcinoma                                                |
| 122 |         |    |     |          |                               | 2 | Pass | 94.8 | Lung     | Lung     | Agree |                                                                                          |
| 123 |         |    |     |          |                               | 3 | Pass | 94.8 | Lung     | Lung     | Agree |                                                                                          |
| 124 |         |    |     |          |                               | 4 | Pass | 84.5 | Lung     | Lung     | Agree |                                                                                          |
| 125 | 06_0274 | 5  | 95  | Lung     | Adrenal gland                 | 1 | Pass | 60.9 | Lung     | Lung     | Agree | Metastatic poorly differentiated carcinoma                                               |
| 126 |         |    |     |          |                               | 2 | Pass | 93.6 | Lung     | Lung     | Agree |                                                                                          |
| 127 |         |    |     |          |                               | 3 | Pass | 95.3 | Lung     | Lung     | Agree |                                                                                          |
| 128 |         |    |     |          |                               | 4 | Pass | 82.0 | Lung     | Lung     | Agree |                                                                                          |
| 129 | 06_0356 | 10 | 70  | Lung     | Lung                          | 1 | Pass | 46.9 | Lung     | Lung     | Agree | Invasive pleomorphic carcinoma w/adenocarcinoma and spindle cell carcinoma               |
| 130 |         |    |     |          |                               | 2 | Pass | 91.6 | Lung     | Lung     | Agree |                                                                                          |
| 131 |         |    |     |          |                               | 3 | Pass | 70.5 | Lung     | Lung     | Agree |                                                                                          |
| 132 |         |    |     |          |                               | 4 | Pass | 55.0 | Lung     | Lung     | Agree |                                                                                          |
| 133 | 06_0268 | 0  | 100 | Lymphoma | Lymph node                    | 1 | Fail |      |          |          |       | Malignant lymphoma with plasmacytic differentiation and numerous large transformed cells |
| 134 |         |    |     |          |                               | 2 | Pass | 92.9 | Lymphoma | Lymphoma | Agree |                                                                                          |
| 135 |         |    |     |          |                               | 3 | Pass | 83.5 | Lymphoma | Lymphoma | Agree |                                                                                          |
| 136 |         |    |     |          |                               | 4 | Fail |      |          |          |       |                                                                                          |
| 137 | 06_0271 | 10 | 90  | Lymphoma | Lymph node                    | 1 | Pass | 55.5 | Lymphoma | Lymphoma | Agree | Malignant neoplasm, strongly favors malignant lymphoma with anaplastic features          |
| 138 |         |    |     |          |                               | 2 | Pass | 64.7 | Lymphoma | Lymphoma | Agree |                                                                                          |
| 139 |         |    |     |          |                               | 3 | Pass | 64.3 | Lymphoma | Lymphoma | Agree |                                                                                          |
| 140 |         |    |     |          |                               | 4 | Pass | 74.8 | Lymphoma | Lymphoma | Agree |                                                                                          |
| 141 | 06_0272 | 5  | 95  | Lymphoma | Thigh mass                    | 1 | Pass | 89.7 | Lymphoma | Lymphoma | Agree | Malignant lymphoma, diffuse large B-cell type                                            |
| 142 |         |    |     |          |                               | 2 | Pass | 93.3 | Lymphoma | Lymphoma | Agree |                                                                                          |
| 143 |         |    |     |          |                               | 3 | Pass | 86.2 | Lymphoma | Lymphoma | Agree |                                                                                          |
| 144 |         |    |     |          |                               | 4 | Pass | 91.8 | Lymphoma | Lymphoma | Agree |                                                                                          |
| 145 | 06_0276 | 0  | 100 | Lymphoma | Thyroid                       | 1 | Pass | 88.2 | Lymphoma | Lymphoma | Agree | Malignant lymphoma of B-cell type with+M195 low and intermediate grade components        |
| 146 |         |    |     |          |                               | 2 | Pass | 91.3 | Lymphoma | Lymphoma | Agree |                                                                                          |
| 147 |         |    |     |          |                               | 3 | Pass | 84.9 | Lymphoma | Lymphoma | Agree |                                                                                          |
| 148 |         |    |     |          |                               | 4 | Pass | 89.0 | Lymphoma | Lymphoma | Agree |                                                                                          |
| 149 | 06_0349 | 0  | 100 | Lymphoma | Spleen / Soft tissue          | 1 | Pass | 86.5 | Lymphoma | Lymphoma | Agree | Diffuse large B-cell lymphoma                                                            |
| 150 |         |    |     |          |                               | 2 | Pass | 74.9 | Lymphoma | Lymphoma | Agree |                                                                                          |
| 151 |         |    |     |          |                               | 3 | Pass | 89.7 | Lymphoma | Lymphoma | Agree |                                                                                          |
| 152 |         |    |     |          |                               | 4 | Pass | 92.7 | Lymphoma | Lymphoma | Agree |                                                                                          |
| 153 | 06_0459 | 1  | 99  | Lymphoma | Extradural mass (c+F87ranium) | 1 | Pass | 71.9 | Lymphoma | Lymphoma | Agree | Anaplastic large cell lymphoma (CD30), Alk-1 negative                                    |
| 154 |         |    |     |          |                               | 2 | Pass | 81.5 | Lymphoma | Lymphoma | Agree |                                                                                          |
| 155 |         |    |     |          |                               | 3 | Pass | 68.5 | Lymphoma | Lymphoma | Agree |                                                                                          |
| 156 |         |    |     |          |                               | 4 | Pass | 74.7 | Lymphoma | Lymphoma | Agree |                                                                                          |
| 157 | 06_0288 | 20 | 70  | Melanoma | Stomach                       | 1 | Pass | 80.4 | Melanoma | Melanoma | Agree | Metastatic melanoma involving full thickness of the gastric wall                         |
| 158 |         |    |     |          |                               | 2 | Pass | 21.2 | Melanoma | IND      | IND   |                                                                                          |
| 159 |         |    |     |          |                               | 3 | Pass | 82.8 | Melanoma | Melanoma | Agree |                                                                                          |
| 160 |         |    |     |          |                               | 4 | Pass | 70.9 | Melanoma | Melanoma | Agree |                                                                                          |
| 161 | 06_0290 | 5  | 94  | Melanoma | Small bowel                   | 1 | Pass | 77.5 | Melanoma | Melanoma | Agree | Metastatic malignant melanoma                                                            |
| 162 |         |    |     |          |                               | 2 | Pass | 78.5 | Melanoma | Melanoma | Agree |                                                                                          |
| 163 |         |    |     |          |                               | 3 | Pass | 83.4 | Melanoma | Melanoma | Agree |                                                                                          |
| 164 |         |    |     |          |                               | 4 | Pass | 65.8 | Melanoma | Melanoma | Agree |                                                                                          |
| 165 | 06_0460 | 0  | 80  | Melanoma | Lung                          | 1 |      |      |          |          |       | Metastatic melanoma                                                                      |
| 166 |         |    |     |          |                               | 2 |      |      |          |          |       |                                                                                          |
| 167 |         |    |     |          |                               | 3 |      |      |          |          |       |                                                                                          |

|     |         |    |     |          |                            |   |      |      |          |          |          |                                                                                                      |
|-----|---------|----|-----|----------|----------------------------|---|------|------|----------|----------|----------|------------------------------------------------------------------------------------------------------|
| 168 |         |    |     |          | 4                          |   |      |      |          |          |          |                                                                                                      |
| 169 | 06_0367 | 10 | 80  | Ovary    | Mesentery /<br>Small bowel | 1 | Pass | 62.8 | Ovary    | Ovary    | Agree    | Poorly differentiated papillary serous carcinoma<br>most likely of ovarian origin                    |
| 170 |         |    |     |          |                            | 2 | Pass | 86.5 | Ovary    | Ovary    | Agree    |                                                                                                      |
| 171 |         |    |     |          |                            | 3 | Pass | 33.5 | Ovary    | Ovary    | Agree    |                                                                                                      |
| 172 |         |    |     |          |                            | 4 | Pass | 89.4 | Ovary    | Ovary    | Agree    |                                                                                                      |
| 173 | 06_0368 | 5  | 95  | Ovary    | Ovary                      | 1 | Pass | 98.5 | Ovary    | Ovary    | Agree    | Papillary serous adenocarcinoma involving both<br>ovaries                                            |
| 174 |         |    |     |          |                            | 2 | Pass | 95.1 | Ovary    | Ovary    | Agree    |                                                                                                      |
| 175 |         |    |     |          |                            | 3 | Pass | 91.7 | Ovary    | Ovary    | Agree    |                                                                                                      |
| 176 |         |    |     |          |                            | 4 | Pass | 94.0 | Ovary    | Ovary    | Agree    |                                                                                                      |
| 177 | 06_0369 | 20 | 80  | Ovary    | Ovary                      | 1 | Pass | 99.1 | Ovary    | Ovary    | Agree    | Papillary, high-grade, serous carcinoma of the ovary                                                 |
| 178 |         |    |     |          |                            | 2 | Pass | 99.0 | Ovary    | Ovary    | Agree    |                                                                                                      |
| 179 |         |    |     |          |                            | 3 | Pass | 98.6 | Ovary    | Ovary    | Agree    |                                                                                                      |
| 180 |         |    |     |          |                            | 4 | Pass | 96.6 | Ovary    | Ovary    | Agree    |                                                                                                      |
| 181 | 06_0264 | 20 | 80  | Pancreas | Pancreas                   | 1 | Fail |      |          |          | Agree    | Pancreatic ductal adenocarcinoma, invasive, poorly<br>differentiated                                 |
| 182 |         |    |     |          |                            | 2 | Pass | 36.0 | Pancreas | Pancreas | Agree    |                                                                                                      |
| 183 |         |    |     |          |                            | 3 | Fail |      |          |          |          |                                                                                                      |
| 184 |         |    |     |          |                            | 4 | Pass | 43.6 | Pancreas | Pancreas | Agree    |                                                                                                      |
| 185 | 06_0275 | 0  | 100 | Pancreas | Pancreas                   | 1 | Pass | 45.3 | Breast   | Breast   | NonAgree | Pancreatic adenosquamous carcinoma, poorly<br>differentiated                                         |
| 186 |         |    |     |          |                            | 2 | Pass | 31.3 | Colon    | Colon    | NonAgree |                                                                                                      |
| 187 |         |    |     |          |                            | 3 | Pass | 25.6 | Colon    | IND      | IND      |                                                                                                      |
| 188 |         |    |     |          |                            | 4 | Pass | 29.4 | Breast   | IND      | IND      |                                                                                                      |
| 189 | 06_0338 | 5  | 85  | Pancreas | Pancreas                   | 1 | Pass | 88.9 | Pancreas | Pancreas | Agree    | Moderately to poorly differentiated pancreatic<br>adenocarcinoma arising in head of pancreas         |
| 190 |         |    |     |          |                            | 2 | Pass | 92.5 | Pancreas | Pancreas | Agree    |                                                                                                      |
| 191 |         |    |     |          |                            | 3 | Pass | 81.1 | Pancreas | Pancreas | Agree    |                                                                                                      |
| 192 |         |    |     |          |                            | 4 | Pass | 84.1 | Pancreas | Pancreas | Agree    |                                                                                                      |
| 193 | 06_0342 | 0  | 100 | Pancreas | Liver                      | 1 | Fail |      |          |          | NonAgree | Moderately differentiated adenocarcinoma<br>consistent w/ pancreatic primary                         |
| 194 |         |    |     |          |                            | 2 | Pass | 70.5 | Colon    | Colon    | NonAgree |                                                                                                      |
| 195 |         |    |     |          |                            | 3 | Fail |      |          |          |          |                                                                                                      |
| 196 |         |    |     |          |                            | 4 | Fail |      |          |          |          |                                                                                                      |
| 197 | 06_0343 | 5  | 95  | Pancreas | Pancreas                   | 1 | Pass | 91.3 | Pancreas | Pancreas | Agree    | Moderately to poorly differentiated pancreatic<br>adenocarcinoma of head of pancreas                 |
| 198 |         |    |     |          |                            | 2 | Pass | 85.8 | Pancreas | Pancreas | Agree    |                                                                                                      |
| 199 |         |    |     |          |                            | 3 | Pass | 83.5 | Pancreas | Pancreas | Agree    |                                                                                                      |
| 200 |         |    |     |          |                            | 4 | Pass | 84.2 | Pancreas | Pancreas | Agree    |                                                                                                      |
| 201 | 06_0347 | 5  | 85  | Pancreas | Pancreas /<br>Duodenum     | 1 | Pass | 53.5 | Pancreas | Pancreas | Agree    | Moderately to poorly differentiated mucinous<br>adenocarcinoma w/signet ring cell features           |
| 202 |         |    |     |          |                            | 2 | Pass | 51.4 | Pancreas | Pancreas | Agree    |                                                                                                      |
| 203 |         |    |     |          |                            | 3 | Pass | 76.6 | Pancreas | Pancreas | Agree    |                                                                                                      |
| 204 |         |    |     |          |                            | 4 | Fail |      |          |          |          |                                                                                                      |
| 205 | 06_0323 | 0  | 100 | Prostate | Lymph node                 | 1 | Pass | 80.8 | Prostate | Prostate | Agree    | Metastatic prostatic adenocarcinoma                                                                  |
| 206 |         |    |     |          |                            | 2 | Pass | 86.2 | Prostate | Prostate | Agree    |                                                                                                      |
| 207 |         |    |     |          |                            | 3 | Pass | 77.9 | Prostate | Prostate | Agree    |                                                                                                      |
| 208 |         |    |     |          |                            | 4 | Pass | 62.3 | Prostate | Prostate | Agree    |                                                                                                      |
| 209 | 06_0328 | 0  | 95  | Prostate | Lymph node                 | 1 | Pass | 96.3 | Prostate | Prostate | Agree    | Metastatic adenocarcinoma consistent with prostatic<br>origin                                        |
| 210 |         |    |     |          |                            | 2 | Fail |      |          |          |          |                                                                                                      |
| 211 |         |    |     |          |                            | 3 | Fail |      |          |          |          |                                                                                                      |
| 212 |         |    |     |          |                            | 4 | Pass | 76.8 | Prostate | Prostate | Agree    |                                                                                                      |
| 213 | 06_0352 | 10 | 80  | Prostate | Lymph node                 | 1 | Pass | 79.0 | Prostate | Prostate | Agree    | Metastatic, high-M179grade prostatic<br>adenocarcinoma                                               |
| 214 |         |    |     |          |                            | 2 | Pass | 78.0 | Prostate | Prostate | Agree    |                                                                                                      |
| 215 |         |    |     |          |                            | 3 | Pass | 72.7 | Prostate | Prostate | Agree    |                                                                                                      |
| 216 |         |    |     |          |                            | 4 | Pass | 67.8 | Prostate | Prostate | Agree    |                                                                                                      |
| 217 | 06_0324 | 0  | 100 | Sarcoma  | Liver                      | 1 | Pass | 87.2 | Sarcoma  | Sarcoma  | Agree    | High-grade sarcoma consistent with+M183<br>metastatic leiomyosarcoma from small intestine<br>primary |
| 218 |         |    |     |          |                            | 2 | Pass | 69.0 | Sarcoma  | Sarcoma  | Agree    |                                                                                                      |
| 219 |         |    |     |          |                            | 3 | Pass | 86.9 | Sarcoma  | Sarcoma  | Agree    |                                                                                                      |
| 220 |         |    |     |          |                            | 4 | Pass | 62.9 | Sarcoma  | Sarcoma  | Agree    |                                                                                                      |
| 221 | 06_0325 | 0  | 100 | Sarcoma  | Lung                       | 1 | Pass | 65.9 | Sarcoma  | Sarcoma  | Agree    | Metastatic osteosarcoma                                                                              |
| 222 |         |    |     |          |                            | 2 | Pass | 80.5 | Sarcoma  | Sarcoma  | Agree    |                                                                                                      |
| 223 |         |    |     |          |                            | 3 | Pass | 71.3 | Sarcoma  | Sarcoma  | Agree    |                                                                                                      |
| 224 |         |    |     |          |                            | 4 | Pass | 39.0 | Sarcoma  | Sarcoma  | Agree    |                                                                                                      |

|     |         |   |    |         |                      |   |      |      |         |         |       |                                                           |
|-----|---------|---|----|---------|----------------------|---|------|------|---------|---------|-------|-----------------------------------------------------------|
| 225 | 06_0359 | 0 | 98 | Sarcoma | Liver                | 1 | Pass | 83.9 | Sarcoma | Sarcoma | Agree | Multiple nodules of metastatic sarcoma                    |
| 226 |         |   |    |         |                      | 2 | Pass | 80.4 | Sarcoma | Sarcoma | Agree |                                                           |
| 227 |         |   |    |         |                      | 3 | Pass | 86.4 | Sarcoma | Sarcoma | Agree |                                                           |
| 228 |         |   |    |         |                      | 4 | Pass | 64.8 | Sarcoma | Sarcoma | Agree |                                                           |
| 229 | 06_0317 | 0 | 90 | Thyroid | Neck mass            | 1 | Pass | 91.3 | Thyroid | Thyroid | Agree | Metastatic follicular carcinoma, follicular variant       |
| 230 |         |   |    |         |                      | 2 | Pass | 92.1 | Thyroid | Thyroid | Agree |                                                           |
| 231 |         |   |    |         |                      | 3 | Pass | 92.2 | Thyroid | Thyroid | Agree |                                                           |
| 232 |         |   |    |         |                      | 4 | Pass | 93.2 | Thyroid | Thyroid | Agree |                                                           |
| 233 | 06_0353 | 0 | 95 | Thyroid | Muscle / Soft tissue | 1 | Pass | 59.1 | Thyroid | Thyroid | Agree | Oncocytic carcinoma of the thyroid with clear cell change |
| 234 |         |   |    |         |                      | 2 | Pass | 79.8 | Thyroid | Thyroid | Agree |                                                           |
| 235 |         |   |    |         |                      | 3 | Pass | 77.4 | Thyroid | Thyroid | Agree |                                                           |
| 236 |         |   |    |         |                      | 4 | Pass | 62.8 | Thyroid | Thyroid | Agree |                                                           |
| 237 | 06_0358 | 0 | 60 | Thyroid | Thyroid              | 1 | Pass | 92.7 | Thyroid | Thyroid | Agree | Papillary carcinoma w/ a few foci of tall cell variant    |
| 238 |         |   |    |         |                      | 2 | Pass | 94.8 | Thyroid | Thyroid | Agree |                                                           |
| 239 |         |   |    |         |                      | 3 | Pass | 94.5 | Thyroid | Thyroid | Agree |                                                           |
| 240 |         |   |    |         |                      | 4 | Pass | 90.0 | Thyroid | Thyroid | Agree |                                                           |

\*As noted per original surgical pathology report.

NonAgree, no agreement.

IND, indeterminate.
